1 **Multiple parasitism promotes facultative host acceptance of cuckoo eggs and rejection**  
2 **of cuckoo chicks**

3 Hee-Jin Noh<sup>1,\*</sup>, Ros Gloag<sup>2</sup>, Naomi E. Langmore<sup>1</sup>

4 <sup>1</sup> Research School of Biology, Australian National University, Building 116, Daley Road,  
5 Canberra, ACT 0200, Australia

6 <sup>2</sup> School of Life and Environmental Sciences, University of Sydney, Macleay Building A12,  
7 Science Road, Sydney, NSW 2006, Australia

8

9 **\*Correspondence**

10 Hee-Jin Noh

11 Email: [u5938384@anu.edu.au](mailto:u5938384@anu.edu.au)

12

13 **Abstract**

14 Many hosts of brood parasitic cuckoos reject foreign eggs from the nest. Yet where nests  
15 commonly receive more than one cuckoo egg, hosts might benefit by instead accepting  
16 parasite eggs. This is because cuckoos remove an egg from the nest before adding their own,  
17 and keeping cuckoo eggs in the nest reduces the odds that further host eggs are removed by  
18 subsequent cuckoos. This ‘clutch dilution effect’ has been proposed as a precondition for the  
19 evolution of cuckoo nestling eviction by hosts, but no previous studies have tested this in a  
20 host that rejects cuckoo nestlings. We tested the clutch dilution hypothesis in large-billed  
21 gerygones (*Gerygone magnirostris*), which are multiply parasitized by little bronze-cuckoos  
22 (*Chalcites minutillus*). Gerygones evict cuckoo nestlings but accept cuckoo eggs. Consistent  
23 with multiple parasitism favouring egg acceptance, we found gerygone egg survival was  
24 higher under scenarios of cuckoo egg acceptance than rejection. Yet gerygones were also  
25 flexible in their egg acceptance, with 35% abandoning cuckoo-egg-only clutches. This novel  
26 demonstration of adaptive clutch dilution suggests that multiple parasitism can favour a  
27 facultative response to brood parasite eggs, whereby hosts accept or reject parasite eggs  
28 depending on clutch composition.

29 **Keywords:** avian brood parasitism, multiple parasitism, clutch dilution hypothesis, egg  
30 acceptance

31

32 **Introduction**

33 The interactions between brood parasites and their hosts are classic examples of  
34 coevolutionary arms races; hosts evolve defenses against parasites, which then select for  
35 counter-adaptations in the parasite (Davies, 2000; Davies, 2011; Rothstein, 1990). For  
36 example, many hosts of brood parasitic birds have evolved the ability to recognize and reject  
37 parasite eggs (Davies and Brooke, 1989, Spottiswoode and Stevens, 2010), in turn selecting  
38 for mimicry of host eggs in brood parasites (Stoddard and Stevens, 2010, 2011; Attard et al.,  
39 2017). Similarly, other hosts have evolved the ability to recognize and reject parasite  
40 nestlings (Langmore et al., 2003, Sato et al., 2010; Tokue and Ueda, 2010), which has  
41 selected for mimicry of host nestlings by brood parasites (Langmore et al., 2011; Noh et al.,  
42 2018; Attisano et al., 2018). However, our understanding of these coevolutionary interactions  
43 is challenged when some hosts fail to evolve defences against their parasite, despite high  
44 costs of parasitism.

45

46 One puzzle is why egg rejection and chick rejection are never observed in the same host.  
47 Chick rejection is rare, but is common among hosts of three species of bronze-cuckoos  
48 *Chalcites* spp. (Langmore et al., 2003; Sato et al., 2010; Tokue and Ueda, 2010; Sato et al.,  
49 2015). One explanation for this is that egg rejection is always the better strategy for hosts,  
50 and that effective egg rejection then reduces selection for subsequent recognition and removal  
51 of chicks. Chick rejection, therefore, should evolve *only* in systems where egg ejection has a  
52 prohibitively high cost (Britton et al., 2007; Grim, 2006; Planqué et al., 2002) or is  
53 constrained by the nest environment (Langmore et al., 2009). While several potential costs of  
54 egg ejection have been identified (e.g. recognition error, Marchant, 1972; Brooker et al., 1990;  
55 Langmore et al., 2005; accidental damage to host eggs; Antonov et al., 2006; Lorenzana and

56 Sealy, 2001), it has yet to be demonstrated that egg ejection is costly in any known chick-  
57 ejecting hosts.

58

59 Here, we test the idea that a cost of rejecting parasitic eggs is the precondition for the  
60 evolution of cuckoo chick ejection by hosts (Sato et al., 2010), via a field study of Australia's  
61 large-billed gerygone (*Gerygone magnirostris*), a chick-ejecting host of the little bronze-  
62 cuckoo (*Chalcites minutillus*). When individual female cuckoos overlap in their use of hosts,  
63 hosts may regularly receive two or more parasite eggs in the nest. Under these circumstances,  
64 acceptance of the parasite eggs can yield a better pay-off for the host than egg eviction due to  
65 a 'clutch dilution effect' (Sato et al., 2010). This is because the parasite typically removes or  
66 destroys one or more eggs in the nest prior to laying her own egg, such that later parasites  
67 sometimes remove the eggs laid by earlier ones, rather than removing the host's own eggs  
68 (Davies and Brooke, 1988), thereby reducing the risk of host egg loss during the egg stage.  
69 The benefits of clutch dilution have been demonstrated in a host of a non-evicting parasite  
70 (the shiny cowbird, *Molothrus bonariensis*) where host young are reared alongside the  
71 parasite young (Gloag et al., 2012). In this case, the benefit of retaining parasite eggs is  
72 presumably sufficient to offset the cost of rearing parasite chicks (Gloag et al., 2012). By  
73 contrast, for large-billed gerygones and other species exploited by cuckoos that evicts host  
74 chicks soon after hatching, host parents can enjoy a clutch dilution effect of tolerating  
75 parasite eggs only if they instead defer parasite rejection to the chick stage (Sato et al., 2010).

76

77 Large-billed gerygones appear to provide a good fit for the conditions of the clutch dilution  
78 hypothesis. They do not reject cuckoo eggs, but can rescue a parasitized brood by recognizing  
79 and evicting cuckoo chicks from the nest soon after hatching (Noh et al., 2018; Sato et al.,  
80 2009). Large-billed gerygones have a small clutch size of 2-3 eggs and their nests are

81 regularly exploited by multiple female cuckoos (Gloag et al., 2014). Also, little bronze-  
82 cuckoos nearly always remove one egg at the time of parasitism (83.3% parasitism events;  
83 Gloag et al., 2014). Little bronze-cuckoos lay a dark olive or brown coloured egg, which is  
84 cryptic inside the dome-shaped nests of large-billed gerygones and quite distinct from the  
85 speckled white eggs of the host (Langmore et al., 2009). Cuckoo egg crypsis may lead  
86 second-to-arrive cuckoos to bias their egg removal toward host eggs (Gloag et al., 2014), but  
87 egg acceptance will still bring a net benefit to gerygones provided cuckoos sometimes  
88 remove previously-laid cuckoo eggs.

89

90 We assessed whether retaining cuckoo eggs in the nest increases gerygone egg survivorship,  
91 relative to rejecting cuckoo eggs, by comparing the number of surviving gerygone eggs in a  
92 clutch after second parasitism events. In addition, we extend the clutch dilution hypothesis by  
93 considering an additional scenario, in which high rates of multiple parasitism result in an  
94 increased probability of nests containing only cuckoo eggs. For example, among 2-egg  
95 gerygone clutches, parasitism by two cuckoos will sometimes result in a clutch with two  
96 cuckoo eggs and no gerygone eggs. In such cases, accepting cuckoo eggs would no longer be  
97 beneficial, and hosts would benefit by switching to alternative defences, such as nest  
98 abandonment or clutch rejection (De Marsico et al., 2013; Langmore et al., 2003). This type  
99 of flexible strategy would depend on hosts being able to detect that their nest contains either  
100 only parasite eggs, or no host eggs.

101

## 102 **Methods**

103 We conducted fieldwork along creek lines in the Cairns region (16°55' S, 145°46' E),  
104 Queensland, Australia. We searched for large-billed gerygone nests during the breeding  
105 season (Aug-Dec, 2016-2018), and monitored the incidence and intensity of parasitism.

106 Large-billed gerygones lay one egg every second day to produce a typical clutch of 2-3 eggs  
107 (mean:  $3 \pm 0.09$  eggs, range: 1-5,  $n = 100$ ; Noh et al., 2018). During egg-laying, we visited the  
108 nests every day and marked eggs to identify them and to check for parasitism, egg rejection,  
109 and nest abandonment. We then continued monitoring the nests at intervals of four- or five-  
110 days during the incubation and nestling stages.

111

112 To assess whether the presence of cuckoo eggs in the clutch decreases the risk of gerygone  
113 egg loss due to subsequent parasitism, we selected nests with three clutch size and assessed  
114 the number of gerygone eggs remaining in nests after second parasitism events for two  
115 categories of multiply parasitized clutches: (A) “Multiple parasitism egg accepters” ( $n=13$ );  
116 nests that had already lost one gerygone egg to cuckoo parasitism (i.e. clutches of two  
117 gerygone eggs plus a cuckoo egg) at the time of a second parasitism event. (B) “Virtual egg  
118 rejecters” ( $n=14$ ); nests that contained two gerygone eggs at the time of the second parasitism  
119 event. This group represented the outcomes for a parasitized three-gerygone-egg clutch in  
120 which the first cuckoo egg had been rejected rather than accepted (Fig. 1-a). Higher gerygone  
121 egg survival in nests of our “egg acceptor” group than our “virtual egg rejecter” group would  
122 indicate that cuckoo eggs in the nest can protect host egg survival, and thus support the clutch  
123 dilution hypothesis for parasite egg acceptance in this host. For comparison, we also recorded  
124 the number of gerygone eggs remaining in unparasitised nests ((C) “Unparasitised” ( $n=26$ );  
125 all unparasitized nests with a clutch size of three) and in nests parasitized just once ((D)  
126 “Single parasitism” ( $n=28$ ); nests that contained three gerygone eggs at the time of parasitism  
127 by a single cuckoo) (Fig. 1-a).

128

129 Because gerygone clutches can naturally comprise either 2 or 3 eggs, it was not always  
130 possible to determine whether a cuckoo had removed the last gerygone egg (recently-laid 3<sup>rd</sup>

131 gerygone egg or no egg at all), as the parasitism event occurred on the same morning that a  
132 3<sup>rd</sup> gerygone egg would have been laid. That is, we could not confirm that the cuckoo  
133 encountered the treatment clutch of two gerygone eggs plus one cuckoo egg at the time of  
134 parasitism. We therefore excluded these nests from our analysis (n=11). For all groups, the  
135 number of surviving gerygone and cuckoo eggs was recorded at the end of the first week of  
136 incubation. To compare the number of surviving gerygone eggs in our four groups, we used a  
137 one-way ANOVA and pairwise comparisons.

138

139 We also recorded all cases of nest abandonment by gerygones that occurred during the egg  
140 stage of nesting. We used chi-square tests to compare the proportion of parasitized nests that  
141 were abandoned when at least one host egg remained, and when only cuckoo eggs (or one  
142 cuckoo egg) remained. To ensure equal opportunity for nest abandonment in all groups, we  
143 excluded nests from our dataset that did not survive until at least one week of incubation. All  
144 analyses were conducted using R ver. 3.5.3 (R Development Core Team, 2019) and the  
145 emmeans packages. Errors reported are the standard error of the mean.

146

## 147 **Results and Discussion**

148 Among all large-billed gerygone nests, 66% (79 of 121) were parasitized by little bronze-  
149 cuckoos, and 34% (27 of 79) of these were parasitized with two (n=23) or more than two  
150 (n=4) cuckoo eggs. We confirm that for multiply parasitized nests of the large-billed  
151 gerygone, the presence of a first-laid cuckoo egg in the nest decreases the risk of host egg  
152 loss in a subsequent parasitism event, relative to a clutch in which that first cuckoo egg were  
153 rejected; multiply parasitized “acceptor” nests (those with two gerygone eggs and one cuckoo  
154 egg) retained 1.62 gerygone eggs ( $\pm 0.10$ , Fig. 1a (A) and 1b (A)) while “virtual egg rejecters”  
155 (those with two gerygone eggs only at the time of parasitism) retained 1.2 gerygone eggs ( $\pm$

156 0.09, Fig. 1a (B) and 1b (B); ANOVA:  $df=3$ ,  $F=97.73$ ;  $P<0.000$ , All pairwise comparisons:  
157  $P<0,05$ ). This is because most cuckoos removed an egg at the time of laying (77 of 88  
158 parasitism events) and around half of all second-to-arrive cuckoos removed a previously laid  
159 cuckoo egg, rather than a gerygone egg ( $n=9$  of 18 multiple parasitism events). Singly  
160 parasitized nests retained 2.18 gerygone eggs ( $\pm 0.07$ , Fig. 1-b), and unparasitized nests had  
161 close to 100% egg survival.

162

163 In gerygones, the combination of high parasitism rate and small clutch size means that  
164 acceptance of cuckoo eggs poses another risk: that the gerygones are left tending a clutch  
165 comprising only cuckoo eggs. Interestingly, gerygones did abandon some parasitized nests  
166 (11%, 9 of 79) and they were more likely to abandon parasitized nests that contained only  
167 cuckoo egg/s (35%, 8 of 23) than those that retained at least one host egg (1%, 1 of 56;  
168 Pearson's Chi-squared test with Yates' continuity correction:  $df=1$ ,  $\chi^2=14.64$ ,  $P<0.000$ ).  
169 However, gerygones never removed host or cuckoo eggs from their nests (unparasitized;  
170  $n=42$ , parasitized;  $n=79$ ). Nor did they ever abandon unparasitized nests containing host eggs  
171 ( $n=42$ ). The trigger for nest abandonment appeared to be the absence of host eggs (rather than  
172 presence of the cuckoo egg), because gerygones were significantly more likely to abandon  
173 nests containing cuckoo eggs, but no host eggs, than nests containing both cuckoo eggs and  
174 host eggs. These results suggest that when parasitism rates are extremely high, it is beneficial  
175 for hosts to persevere with clutches containing at least one host egg, because any new  
176 breeding attempt is also likely to be parasitized. Hosts are also selected under such conditions  
177 though to recognize and reject nests in which no host eggs remain. Nest abandonment in  
178 large-billed gerygones thus appears to be a response to brood parasitism, and shows that  
179 large-billed gerygones exhibit plasticity in their egg stage defences, utilizing cuckoo egg  
180 acceptance in most cases (and benefiting from a clutch dilution effect), when there is some



181 chance of successfully fledging their own young, but switching to nest abandonment when  
182 there is no possibility of rearing their own chicks.

183

184 Theoretical models propose that only egg acceptors will evolve chick discrimination (Britton  
185 et al., 2007; Grim, 2006; Planqué et al., 2002). At our study site, a parasitized gerygone nest  
186 has a one in three chance of being parasitized again. This high risk of egg loss from second-  
187 to-arrive cuckoos is coupled with the high cost of accepting cuckoo nestlings, whose eviction  
188 behaviour removes any remaining host brood. Thus, in gerygones and other systems with  
189 highly virulent parasites, multiple parasitism should promote chick rejection as the optimal  
190 host defense. In conclusion, our results demonstrate that multiple parasitism drives a  
191 facultative response to cuckoo eggs depending on clutch composition, and supports the  
192 argument that a clutch dilution effect has promoted the evolution of parasite nestling rejection  
193 (Sato et al., 2010).

194

#### 195 **Acknowledgements**

196 We are grateful to Virginia Abernathy, Garam Kim, Benjamin Ewing, Adélie Krellenstein,  
197 Owen Goodyear for their field assistance. We also acknowledge Cairns Regional Council for  
198 access to the Botanic Gardens and other council property. We kindly thank Brian Venables  
199 all his help with the little bronze-cuckoo project over several years

200

201 **Reference**

- 202 Antonov A, Stokke BG, Moksnes A, Kleven O, Honza OM, and Røskaft E (2006) Eggshell  
203 strength of an obligate brood parasite: a test of the puncture resistance  
204 hypothesis *Behavioral Ecology and Sociobiol* 60:11-18.
- 205 Attard MRG, Medina I, Langmore NE, and Sherratt E (2017) Egg shape mimicry in parasitic  
206 cuckoos *Journal of Evolutionary Biology* 30:2079-2084.
- 207 Attisano A, Sato NJ., Tanaka KD, Okahisa Y, Kuehn R, Gula R, Ueda K, Theuerkauf J (2018)  
208 Visual discrimination of polymorphic nestlings in a cuckoo-host system. *Scientific*  
209 *Reports* 8:10359.
- 210 Britton N, Planqué R, Franks N (2007) Evolution of defence portfolios in exploiter-victim  
211 systems *Bulletin of mathematical biology* 69:957-988.
- 212 Brooker LC, Brooker MG, Brooker AMH (1990) An alternative population/genetics model  
213 for the evolution of egg mimesis and egg crypsis in cuckoos *Journal of Theoretical*  
214 *Biology* 146:123-143.
- 215 R Development Core Team (2019) R: A Language and Environment for Statistical  
216 Computing. R Foundation for Statistical Computing.
- 217 Davies NB (2011) Cuckoo adaptations: trickery and tuning. *Journal of Zoology* 284:1-14.
- 218 Davies NB, and Brooke MDL. 1988. Cuckoos versus reed warblers: adaptations and  
219 counteradaptations *Animal Behaviour* 36:62-284
- 220 Davies NB, Brooke MDL (1989) An experimental study of co-evolution between the cuckoo,  
221 *Cuculus canorus*, and its hosts. I. Host egg discrimination *Journal of Animal Ecology*  
222 58:207-224.
- 223 Davies NB (2000) Cuckoos, cowbirds and other cheats, A&C Black.
- 224 De Mársico MC, Gloag R, Ursino CA, Reboreda JC (2013) A novel method of rejection of  
225 brood parasitic eggs reduces parasitism intensity in a cowbird host. *Biology letters*

- 226 9:20130076.
- 227 Gloag R, Fiorini VD, Reboreda JC, and Kacelnik A (2012) Brood parasite eggs enhance egg  
228 survivorship in a multiply parasitized host *Proceedings of the Royal Society B:*  
229 *Biological Sciences* 279:1831-1839.
- 230 Gloag R, Keller LA, and Langmore NE (2014) Cryptic cuckoo eggs hide from competing  
231 cuckoos. *Proceedings of the Royal Society of London B: Biological Sciences*  
232 281:20141014.
- 233 Grim T (2006) The evolution of nestling discrimination by hosts of parasitic birds: why is  
234 rejection so rare? *Evolutionary Ecology Research* 8:785-802.
- 235 Krüger O (2011) Brood parasitism selects for no defence in a cuckoo host *Proceedings of the*  
236 *Royal Society of London B: Biological Sciences* 278:2777-2783.
- 237 Langmore NE, Stevens M, Maurer G, Heinsohn R, Hall ML, Peters A, and Kilner RM (2011)  
238 Visual mimicry of host nestlings by cuckoos *Proceedings of the Royal Society B*  
239 278:2455-2463.
- 240 Langmore NE (2013) Fairy-wrens as a model system for studying cuckoo - host coevolution.  
241 *Emu* 113:302-308.
- 242 Langmore NE., Stevens M, Maurer G, and Kilner R (2009) Are dark cuckoo eggs cryptic in  
243 host nests? *Animal Behaviour* 78:461-468.
- 244 Langmore NE, Kilner RM, Butchart SHM, Maurer G, Davies NB, Cockburn A, Macgregor N,  
245 Peters A, Magrath MJL, and Dowling D (2005) The evolution of egg rejection by  
246 cuckoo hosts in Australia and Europe *Behavioral Ecology* 16:686-692.
- 247 Langmore NE, Hunt S, Kilner RM (2003) Escalation of a coevolutionary arms race through  
248 host rejection of brood parasitic young *Nature* 422:157-160.
- 249 Langmore NE, Stevens M, Maurer G, Kilner RM (2009) Are dark cuckoo eggs cryptic in host  
250 nests? *Animal Behaviour* 78: 461-468

- 251 Lorenzana JC, Sealy SG (2001) Fitness costs and benefits of cowbird egg ejection by gray  
252 catbirds *Behavioral Ecology* 12:325-329.
- 253 Marchant S (1972) Evolution of the genus *Chrysococcyx* *Ibis* 114:219-233
- 254 Medina I, Langmore NE (2015) Coevolution is linked with phenotypic diversification but not  
255 speciation in avian brood parasites *Proceedings of Royal Society B: Biological*  
256 *Sciences* 282:20152056.
- 257 Mulyani YA (2004) Reproductive ecology of tropical mangrove-dwelling warblers: the roles  
258 of nest predation, brood parasitism and food limitation, Phd Thesis Charles Darwin  
259 University.
- 260 Noh HJ, Gloag R, Langmore NE (2018) True recognition of nestlings by hosts selects for  
261 mimetic cuckoo chicks *Proceedings of the Royal Society B: Biological Sciences*  
262 285:20180726.
- 263 Planqué R, Britton NF, Franks NR, Peletier MA (2002) The adaptiveness of defence  
264 strategies against cuckoo parasitism *Bulletin of Mathematical Biology* 64:1045-1068.
- 265 Rothstein SI (1990) A model system for coevolution: avian brood parasitism *Annual Review*  
266 *of Ecology and Systematics* 21:481-508.
- 267 Sato NJ, Mikami OK, Ueda K (2010) The egg dilution effect hypothesis: a condition under  
268 which parasitic nestling ejection behaviour will evolve *Ornithological Science* 9:115-  
269 121.
- 270 Sato NJ, Tokue K, Noske RA, Mikami OK, and Ueda K (2009) Evicting cuckoo nestlings  
271 from the nest: a new anti-parasitism behaviour *Biology letters* 6:67-69.
- 272 Sato NJ, Tanaka KD, Okahisa Y, Yamamichi M, Kuehn R, Gula R, Ueda K, Theuerkauf J  
273 (2015) Nestling polymorphism in a cuckoo-host system *Current Biology* 25:R1164-  
274 R1165
- 275 Spottiswoode CN, Stevens M (2010) Visual modeling shows that avian host parents use

276 multiple visual cues in rejecting parasitic eggs *PNAS* 107:8672-8676.

277 Stoddard MC, Stevens M (2010) Pattern mimicry of host eggs by the common cuckoo, as  
278 seen through a bird's eye *Proceedings of the Royal Society B: Biological Sciences*  
279 277:1387-1393.

280 Stoddard MC, Stevens M (2011) Avian vision and the evolution of egg color mimicry in the  
281 common cuckoo *Evolution* 65:2004-2013.

282 Tokue K, Ueda K (2010) Mangrove Gerygones *Gerygone laevigaster* eject little bronze-  
283 cuckoo  
284 *Chalcites minutillus* hatchlings from parasitized nests *Ibis* 152:835-839.  
285

286 **Figure legend**

287 **Figure 1.** (a) An illustration of nest compositions (the numbers referring samples size) and (b)  
288 the number of host eggs remaining in nests at the end of incubation for nests of (A) multiply  
289 parasitised acceptor hosts, (B) virtual egg rejecter hosts, and (C) nests that were unparasitized  
290 or (D) singly parasitized. Host egg survival differed significantly between all groups.

291

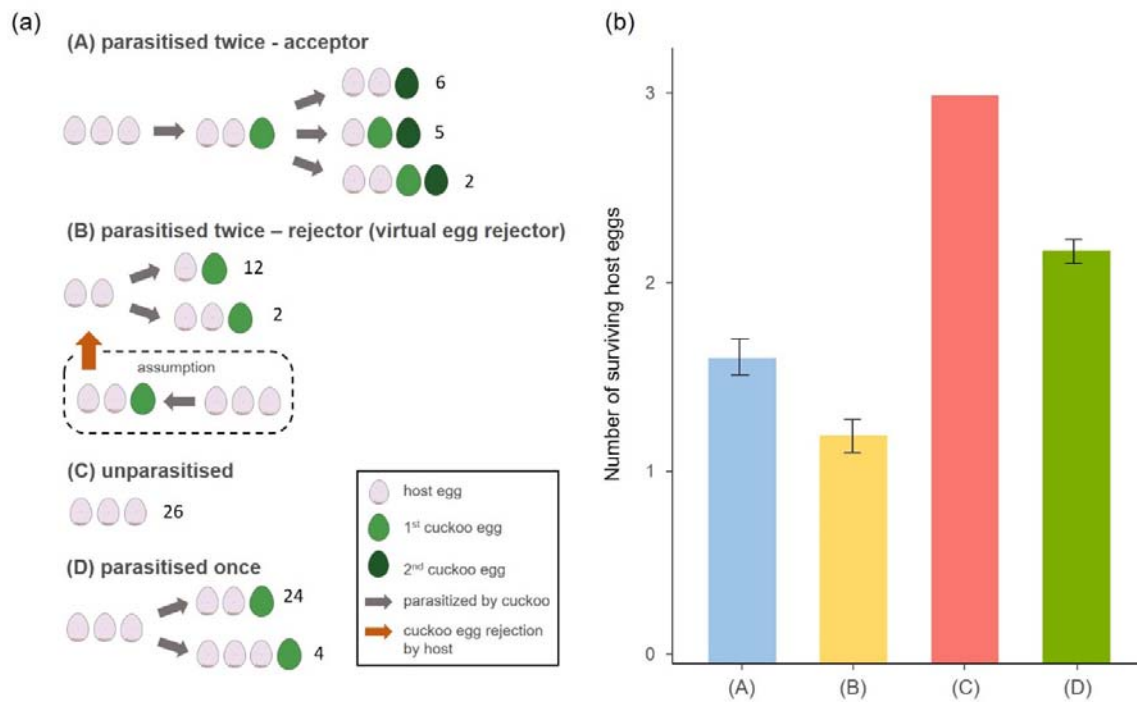

292
